# Supplementary material for: Biophysical and Biochemical Characterization of the Binding of the MarR-like Transcriptional Regulator Saro_0803 to the nov1 Promotor and Its Inhibition by Resveratrol
Source: MDPI journal article supplement (doi:10.3390/biom13030541), 2023-03-16
Supplement: s1 [file s1]

## Supplementary Figures

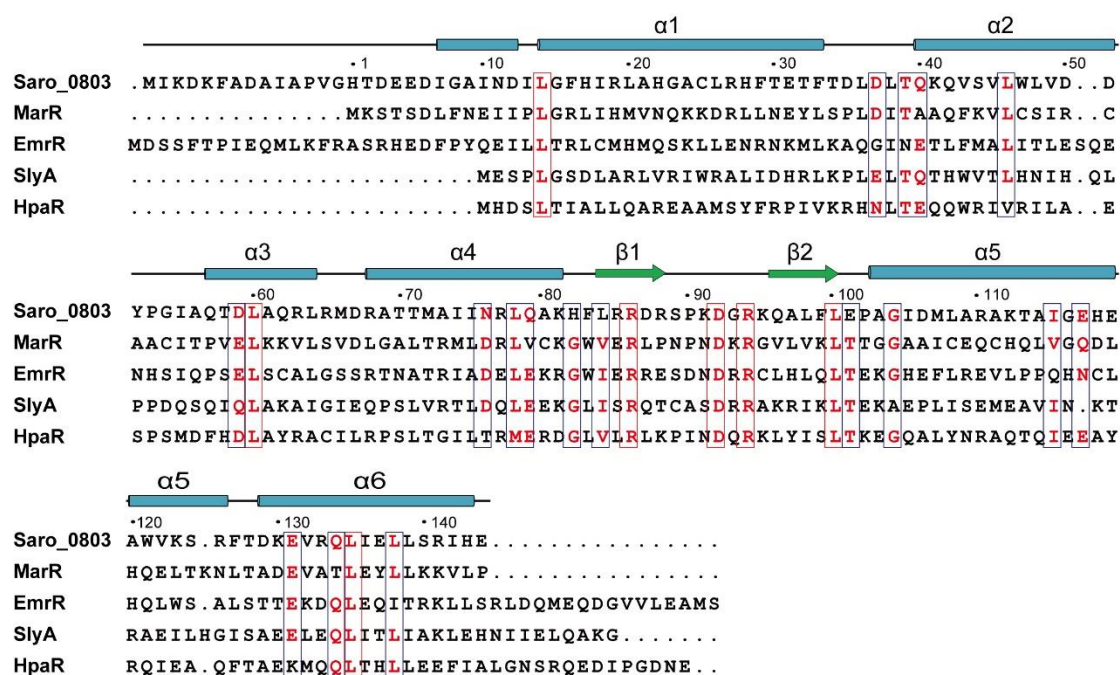

**Figure. S1** Structural-based multisequence alignment of MarR family proteins featuring Saro\_0803 from *Novosphingobium aromaticivorans* DSM 12444, MarR [1], EmrR [2], SlyA [3], HpaR (ID: WP\_000543916.1). The conserved residues (indicated in red boxes) and the relatively conserved residues (indicated in blue boxes) [4].

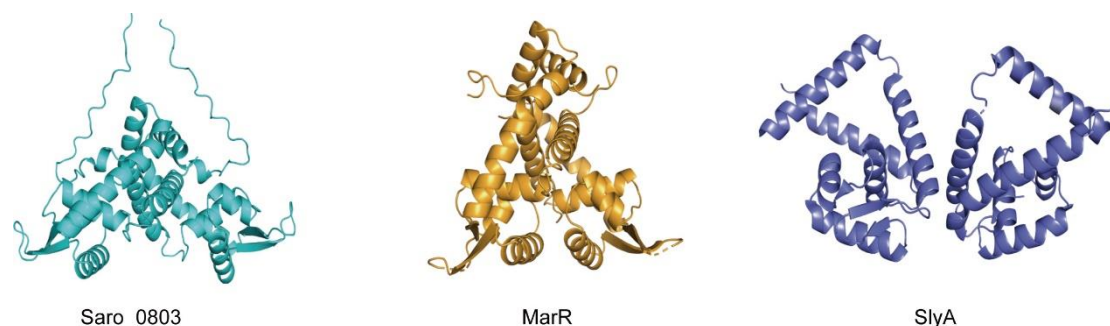

**Figure. S2** Comparison of the structural model of Saro\_0803 with the crystal structure of MarR [1] (PDB ID: 4JBA) and SlyA (PDB ID: 3DEU) [3], colored in cyan, orange and purple, respectively.

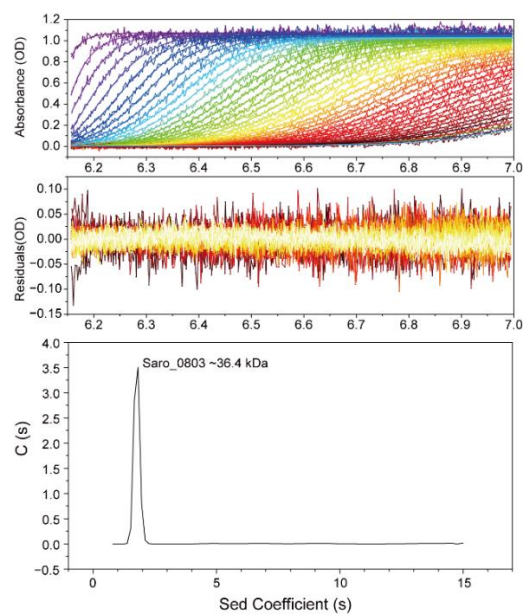

**Figure. S3** The sedimentation absorbance curve (upper panel), residuals curve (OD, middle panel) and the Sed coefficient (s) curve (lower panel) detection by analytical ultracentrifugation (AUC) experiments.

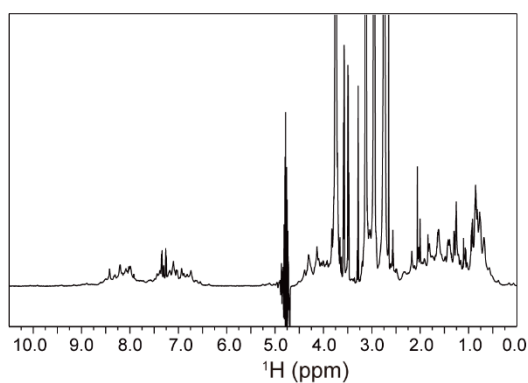

**Figure. S4** One-dimensional [ $^1\text{H}$ ] spectrum of Saro\_0803.

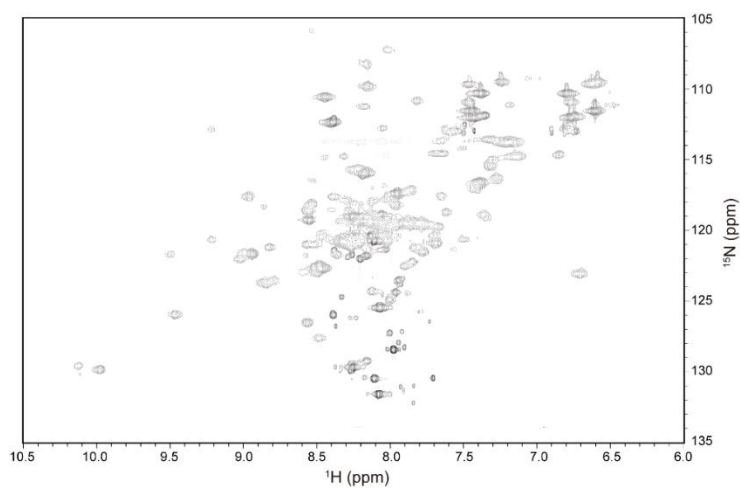

**Figure. S5** Two-dimensional [ $^1\text{H}$ - $^{15}\text{N}$ ]-HSQC spectrum of Saro\_0803.



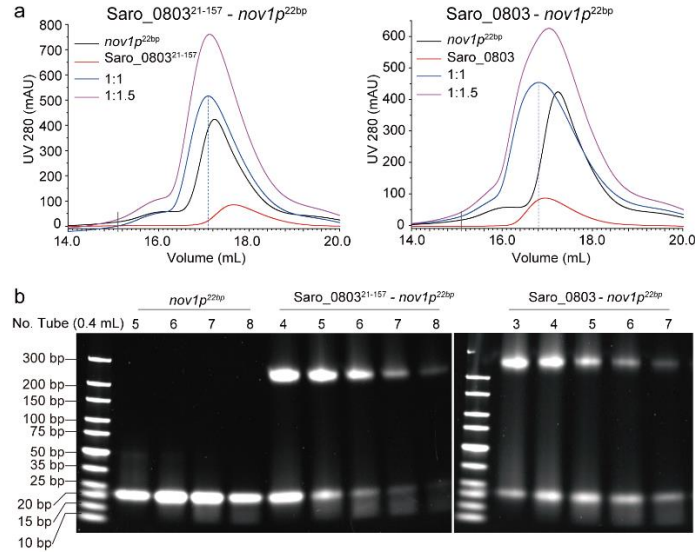

**Figure. S8** Analytic size exclusion chromatography experiments to detect the protein–DNA interactions of Saro\_0803 and its truncation Saro\_0803<sup>21-157</sup> to its operator DNA sequence *nov1p*<sup>22bp</sup> utilizing Superdex 200 increase 10/300 GL column (GE Healthcare, Chicago, IL, USA). The upper section (a) indicates the absorbance curve of DNA sequence *nov1p*<sup>22bp</sup> with increased ratio to the absence and presence of Saro\_0803 and its truncation Saro\_0803<sup>21-157</sup>. The lower section (b) indicates the EMSA analysis to confirm the migration of the binding curve at the ratio of 1:1, where the collection of elution begins at 15.1 mL with 0.4 mL per tube.

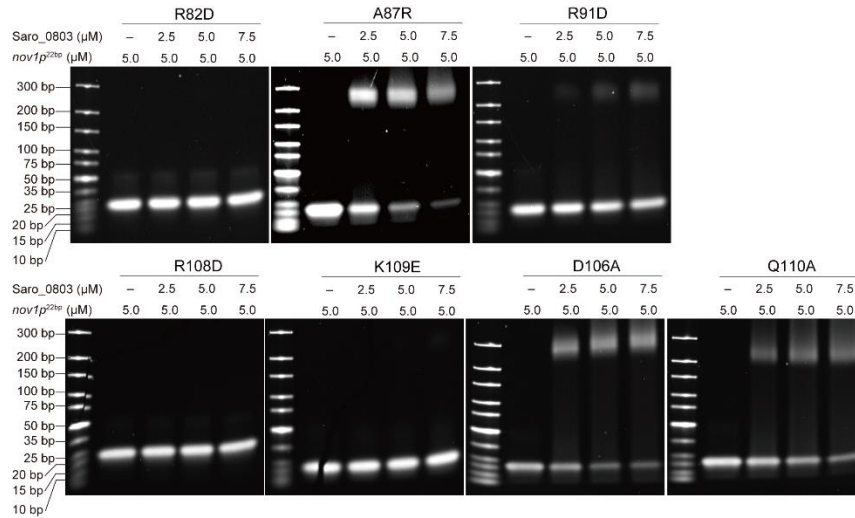

**Figure. S9** EMSA analysis of the binding site of mutants of Saro\_0803. The proteins with increased concentrations of 0, 2.5, 5.0, and 7.5 μM were incubated with 5.0 μM DNA sequence *nov1p*<sup>22bp</sup>.

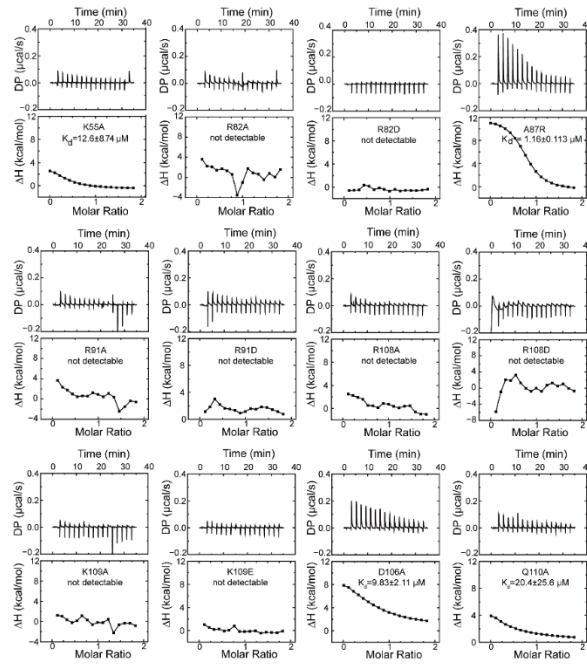

**Figure. S10** The diagram of binding affinity ( $K_d$ ) and enthalpy values ( $\Delta H$ ) of mutants of Saro\_0803, related to residues bound to the core DNA sequence *novIp*<sup>22bp</sup>, detected by the performance of ITC experiments.

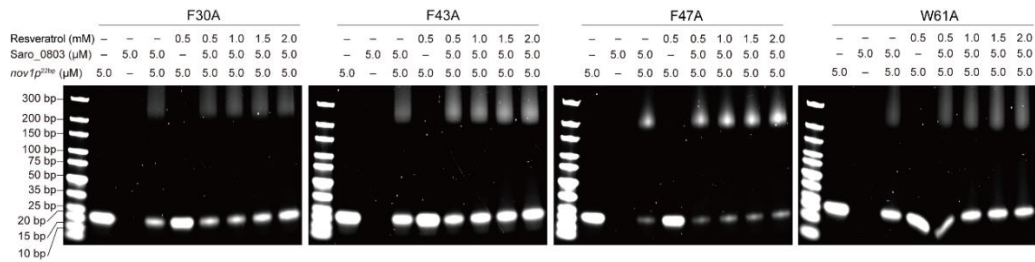

**Figure. S11** EMSA analysis to investigate the ligand resveratrol perturbing the mutants of F30A, F43A, F47A and W61A of Saro\_0803 binding to the core sequence *novIp*<sup>22bp</sup>. Incrementally increased concentrations of resveratrol (0, 0.5, 1.0, 1.5, 2.0 mM) were incubated with 5.0 μM mutated protein-*novIp*<sup>22bp</sup> complex.

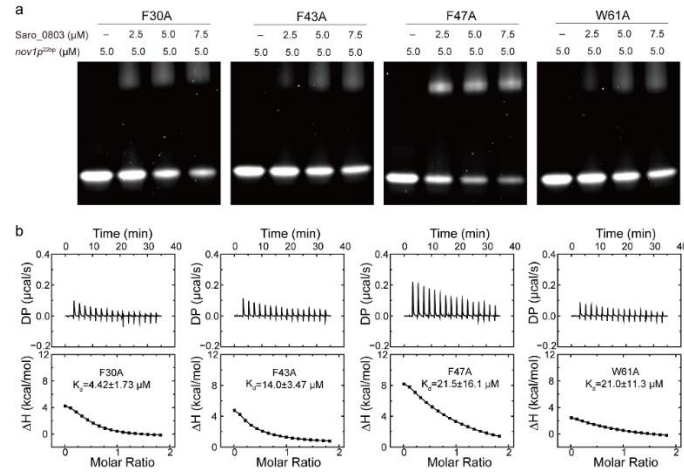

**Figure. S12** Characterization of the binding capability of Saro\_0803 mutants with *novIp*<sup>22bp</sup>. **(a)** EMSA analysis of the mutants related to the hydrophobic cavity of Saro\_0803 to *novIp*<sup>22bp</sup>. **(b)** ITC assay with continuous titration of *novIp*<sup>22bp</sup> into Saro\_0803 mutants. The proteins with increased concentrations of 0, 2.5, 5.0, and 7.5  $\mu\text{M}$  were incubated with 5.0  $\mu\text{M}$  DNA sequence *novIp*<sup>22bp</sup> and the diagram of binding affinity ( $K_d$ ) and enthalpy values ( $\Delta\text{H}$ ) of mutants of Saro\_0803, related to residues bound to the core DNA sequence *novIp*<sup>22bp</sup>, detected by the performance of ITC experiments.

## Supplementary Tables

**Table. S1** The PCR primers commercially synthesized for the plasmid constructs.

| Name (vector pET 30a+)        | Sequence(5'-3')                           |
|-------------------------------|-------------------------------------------|
| Saro_0803-F                   | GGAATTCATATGATCAAGATAAATTTGCGGACGC        |
| Saro_0803-R                   | CCGCTCGAG TTCGTGAATGCGAGACAGC             |
| Saro_0803 <sup>30A</sup> -F   | GATCAACGATATTCTGGTGCCCATATTCTGTGGCCCA     |
| Saro_0803 <sup>30A</sup> -R   | TGGGCCAGACGAATATGGCACCCAGAATATCGTTGATC    |
| Saro_0803 <sup>43A</sup> -F   | GCATGCTGGGTACGCTACCGAAACGTTCAACCGA        |
| Saro_0803 <sup>43A</sup> -R   | TCGGTGAACGTTTCGGTAGCGTGACGCAGGCATGC       |
| Saro_0803 <sup>47A</sup> -F   | CGTCACCTTTACCGAAACGGCCACCGATCTGGACCTGAC   |
| Saro_0803 <sup>47A</sup> -R   | GTCAGGTCAGATCGGTGGCCGTTTCGGTAAAGTGACG     |
| Saro_0803 <sup>105A</sup> -F  | TCTGACCTGACGCAGGCACAAGTAGTGTTCTGTGG       |
| Saro_0803 <sup>105A</sup> -R  | CCACAGAACACTCACTTGTGCTGCGTCAGGTCACGA      |
| Saro_0803 <sup>161A</sup> -F  | AGAAACAAGTGAGTCTTCTGGCGCTGGTCGATGACTATCC  |
| Saro_0803 <sup>161A</sup> -R  | GGATAGTCATCGACCGCCAGAACACTCACTGTGTTCT     |
| Saro_0803 <sup>182A</sup> -F  | GTCTGCGCATGGACGCTGCTACACGATGG             |
| Saro_0803 <sup>182A</sup> -R  | CCATCGGTGAGCAGCGTCCATGCGCAGAC             |
| Saro_0803 <sup>182C</sup> -F  | AACGCTCGCGCATGGACGATGCTACACGATGGCGA       |
| Saro_0803 <sup>182C</sup> -R  | TCGCCATCGTGTAGCATGCTCCATGCGCAGACGTT       |
| Saro_0803 <sup>187R</sup> -F  | CCGTGCTACCAGCATGCGGATTATCAATCGCCTGCAAG    |
| Saro_0803 <sup>187R</sup> -R  | CTTGACGGCGATTGATAATCCG CATCGTGTAGCACGG    |
| Saro_0803 <sup>189A</sup> -F  | CGATGGCGATTATCAATGCCCTGCAAGCCAAAC         |
| Saro_0803 <sup>189A</sup> -R  | GTTTGGCTTGCAGGCGATTGATAATCGCCATCG         |
| Saro_0803 <sup>189C</sup> -F  | CACGATGGCGATTATCAATGACCTGCAAGCCAAACATTTCT |
| Saro_0803 <sup>189C</sup> -R  | AGAAAAATGTTGGCTTGCAGGCTATTGATAATCGCCATCGT |
| Saro_0803 <sup>2105A</sup> -F | CGATCGTAGCCGAAAGCCGGCCGCAACAAGCTC         |
| Saro_0803 <sup>2105A</sup> -R | GAGCTTGTTCGCGCCGCTTCGGGCTACGATCG          |
| Saro_0803 <sup>2105A</sup> -F | AGCCCGAAAGACGGCGCCAAACAAGCTCTGTTCTGG      |
| Saro_0803 <sup>2105A</sup> -R | CCAGGAACAGAGCTTGTGTTGGCGCGTCTTCGGGCT      |
| Saro_0803 <sup>2105C</sup> -F | TAGCCCGAAAGACGGCGCAACAAGCTCTGTTCTCTGG     |
| Saro_0803 <sup>2105C</sup> -R | CCAGGAACAGAGCTTGTGTTGGCGCTCTTCGGGCTA      |
| Saro_0803 <sup>2105A</sup> -F | CGAAAGACGGCGCGCACAAGCTCTGTTCTCTGG         |
| Saro_0803 <sup>2105A</sup> -R | CCAGGAACAGAGCTTGTGCGCGCGCTCTTTCG          |
| Saro_0803 <sup>2105C</sup> -F | GAAAGACGGCGCGCAACAAGCTCTGTTCT             |
| Saro_0803 <sup>2105C</sup> -R | GAAAGACGGCGCGCAACAAGCTCTGTTCTGGAAC        |
| Saro_0803 <sup>2110A</sup> -F | GTTCCAGGAACAGAGCTGCTTTCGGCGCGTCTTC        |

**Table. S2** The Oligonucleotides sequence commercially synthesized for double-strand DNA synthesis by annealing, with truncations presented per 3 bp from the upstream of *nov1p*<sup>58bp</sup>.

| Name                                                                 | DNA sequence(5'-3')                                                                                                      |
|----------------------------------------------------------------------|--------------------------------------------------------------------------------------------------------------------------|
| <i>nov1p</i> <sup>58bp</sup>                                         | CCAACGAATGCGCTTGTCTAATTGTTAGCAATACATACAATATTGCAAGGAGGATGCC<br>GGCATCCTCCTTGCAATATTGTATGTATTGCTAACAAATTAGACAAGCGCATTCGTGG |
| Truncation per 3bp from the upstream of <i>nov1p</i> <sup>58bp</sup> |                                                                                                                          |
| 5'-Forward: -3bp                                                     | ACGAATGCGCTTGTCTAATTGTTAGCAATACATACAATATTGCAAGGAGGATGCC<br>GGCATCCTCCTTGCAATATTGTATGTATTGCTAACAAATTAGACAAGCGCATTCGT      |
| 5'-Forward: -6bp                                                     | AATGCGCTTGTCTAATTGTTAGCAATACATACAATATTGCAAGGAGGATGCC<br>GGCATCCTCCTTGCAATATTGTATGTATTGCTAACAAATTAGACAAGCGCATTC           |
| 5'-Forward: -9bp                                                     | GCGCTTGTCTAATTGTTAGCAATACATACAATATTGCAAGGAGGATGCC<br>GGCATCCTCCTTGCAATATTGTATGTATTGCTAACAAATTAGACAAGCGC                  |
| 5'-Forward: -12bp                                                    | CTTGTCTAATTGTTAGCAATACATACAATATTGCAAGGAGGATGCC<br>GGCATCCTCCTTGCAATATTGTATGTATTGCTAACAAATTAGACAAG                        |
| 5'-Forward: -15bp                                                    | GTCTAATTGTTAGCAATACATACAATATTGCAAGGAGGATGCC<br>GGCATCCTCCTTGCAATATTGTATGTATTGCTAACAAATTAGAC                              |
| 5'-Forward: -18bp                                                    | TAATTGTTAGCAATACATACAATATTGCAAGGAGGATGCC<br>GGCATCCTCCTTGCAATATTGTATGTATTGCTAACAAATT                                     |
| 5'-Forward: -21bp                                                    | TTGTTAGCAATACATACAATATTGCAAGGAGGATGCC<br>GGCATCCTCCTTGCAATATTGTATGTATTGCTAACAA                                           |
| 5'-Forward: -24bp                                                    | TTAGCAATACATACAATATTGCAAGGAGGATGCC<br>GGCATCCTCCTTGCAATATTGTATGTATTGCTAA                                                 |
| 5'-Forward: -27bp                                                    | GCAATACATACAATATTGCAAGGAGGATGCC<br>GGCATCCTCCTTGCAATATTGTATGTATTGC                                                       |
| 5'-Forward: -30bp                                                    | ATACATACAATATTGCAAGGAGGATGCC<br>GGCATCCTCCTTGCAATATTGTATGTAT                                                             |
| 5'-Forward: -33bp                                                    | CATACAATATTGCAAGGAGGATGCC<br>GGCATCCTCCTTGCAATATTGTATG                                                                   |
| 5'-Forward: -36bp                                                    | ACAATATTGCAAGGAGGATGCC<br>GGCATCCTCCTTGCAATATTGT                                                                         |



**Table. S3** The Oligonucleotides sequence commercially synthesized for double-strand DNA synthesis by annealing, with truncations presented per 3 bp from the downstream of *nov1p*<sup>58bp</sup>.

| Name                                                                   | DNA sequence(5'-3')                                                                                                      |
|------------------------------------------------------------------------|--------------------------------------------------------------------------------------------------------------------------|
| <i>nov1p</i> <sup>58bp</sup>                                           | CCAACGAATGCGCTTGTCTAATTGTTAGCAATACATACAATATTGCAAGGAGGATGCC<br>GGCATCCTCCTTGCAATATTGTATGTATTGCTACAATTAGACAAGCGCATTCTGTTGG |
| Truncation per 3bp from the downstream of <i>nov1p</i> <sup>58bp</sup> |                                                                                                                          |
| 3'-Reverse: -3bp                                                       | CCAACGAATGCGCTTGTCTAATTGTTAGCAATACATACAATATTGCAAGGAGGAT<br>ATCCTCCTTGCAATATTGTATGTATTGCTACAATTAGACAAGCGCATTCTGTTGG       |
| 3'-Reverse: -6bp                                                       | CCAACGAATGCGCTTGTCTAATTGTTAGCAATACATACAATATTGCAAGGAG<br>CTCCTTGCAATATTGTATGTATTGCTACAATTAGACAAGCGCATTCTGTTGG             |
| 3'-Reverse: -9bp                                                       | CCAACGAATGCGCTTGTCTAATTGTTAGCAATACATACAATATTGCAAG<br>CTTGCAATATTGTATGTATTGCTACAATTAGACAAGCGCATTCTGTTGG                   |
| 3'-Reverse: -12bp                                                      | CCAACGAATGCGCTTGTCTAATTGTTAGCAATACATACAATATTGCAAG<br>GCAATATTGTATGTATTGCTACAATTAGACAAGCGCATTCTGTTGG                      |
| 3'-Reverse: -15bp                                                      | CCAACGAATGCGCTTGTCTAATTGTTAGCAATACATACAATATTGCAAG<br>ATATTGTATGTATTGCTACAATTAGACAAGCGCATTCTGTTGG                         |

**Table. S4** The Oligonucleotides sequence commercially synthesized for double-strand DNA synthesis by annealing, with truncations presented per 1 bp from the downstream of *nov1p*<sup>25bp</sup>.

| Name                                                                   | DNA sequence(5'-3')                                   |
|------------------------------------------------------------------------|-------------------------------------------------------|
| <i>nov1p</i> <sup>25bp</sup>                                           | TAATTGTTAGCAATACATACAATAT<br>ATATTGTATGTATTGCTACAATTA |
| Truncation per 1bp from the downstream of <i>nov1p</i> <sup>25bp</sup> |                                                       |
| 3'-Reverse: -1bp                                                       | TAATTGTTAGCAATACATACAATA<br>TATTGTATGTATTGCTACAATTA   |
| 3'-Reverse: -2bp                                                       | TAATTGTTAGCAATACATACAAT<br>ATTGTATGTATTGCTACAATTA     |
| 3'-Reverse: -3bp                                                       | TAATTGTTAGCAATACATACAA<br>TTGTATGTATTGCTACAATTA       |
| 3'-Reverse: -4bp                                                       | TAATTGTTAGCAATACATACA<br>TGTATGTATTGCTACAATTA         |

**Table. S5** The ITC determination statistics of enthalpy term ( $\Delta H$ ), entropy term ( $-T\Delta S$ ), Gibbs free energy ( $\Delta G$ ) and the stoichiometry N (sites).

| the ITC determination                                                                                 |                 |                       |                         |                       |              |
|-------------------------------------------------------------------------------------------------------|-----------------|-----------------------|-------------------------|-----------------------|--------------|
|                                                                                                       | Kd(M)           | $\Delta H$ (kcal/mol) | $-T\Delta S$ (kcal/mol) | $\Delta G$ (kcal/mol) | N (sites)    |
| Ctrl                                                                                                  | NA              | NA                    | NA                      | NA                    | NA           |
| Saro_0803                                                                                             | 3.57e-6±703e-9  | 6.70±0.463            | -14.1                   | -7.43                 | 0.923±3.3e-2 |
| F30A                                                                                                  | 4.42e-6±1.73e-6 | 6.98±1.48             | -14.3                   | -7.31                 | 0.439±4.2e-2 |
| F43A                                                                                                  | 14.0e-6±3.47e-6 | 37.2±44.3             | -43.9                   | -6.62                 | 0.101±9.4e-2 |
| F47A                                                                                                  | 21.5e-6±16.1e-6 | 22.7±15.1             | -29                     | -6.37                 | 0.720±0.138  |
| K55A                                                                                                  | 12.2e-6±8.97e-6 | 12.2±15.7             | -18.9                   | -6.7                  | 0.339±4.8e-2 |
| W61A                                                                                                  | 21.0e-6±11.3e-6 | 12.5±11.7             | -18.9                   | -6.38                 | 0.144±2.24   |
| R82A                                                                                                  | NA              | NA                    | NA                      | NA                    | NA           |
| R82D                                                                                                  | NA              | NA                    | NA                      | NA                    | NA           |
| A87R                                                                                                  | 1.16e-6±113e-9  | 12.5±0.275            | -20.6                   | -8.1                  | 0.771±8.8e-3 |
| R91A                                                                                                  | NA              | NA                    | NA                      | NA                    | NA           |
| R91D                                                                                                  | NA              | NA                    | NA                      | NA                    | NA           |
| R108A                                                                                                 | 45.6e-6±166e-6  | 11.7±47.0             | -17.6                   | -5.92                 | 0.947±1.18   |
| R108D                                                                                                 | NA              | NA                    | NA                      | NA                    | NA           |
| K109A                                                                                                 | NA              | NA                    | NA                      | NA                    | NA           |
| K109E                                                                                                 | NA              | NA                    | NA                      | NA                    | NA           |
| D106A                                                                                                 | 9.83e-6±2.11e-6 | 12.8±1.75             | -19.6                   | -6.83                 | 0.640±2.5e-2 |
| Q110A                                                                                                 | 20.4e-6±25.6e-6 | 15.1±33.3             | -21.5                   | -6.4                  | 0.134±1.94   |
| notes: the binding determination of Saro_0803 and related mutants to the <i>nov1p</i> <sup>22bp</sup> |                 |                       |                         |                       |              |
| the ITC determination                                                                                 |                 |                       |                         |                       |              |
|                                                                                                       | Kd(M)           | $\Delta H$ (kcal/mol) | $-T\Delta S$ (kcal/mol) | $\Delta G$ (kcal/mol) | N (sites)    |
| Ctrl                                                                                                  | NA              | NA                    | NA                      | NA                    | NA           |
| F30A                                                                                                  | NA              | NA                    | NA                      | NA                    | NA           |
| F43A                                                                                                  | NA              | NA                    | NA                      | NA                    | NA           |
| F47A                                                                                                  | NA              | NA                    | NA                      | NA                    | NA           |
| W61A                                                                                                  | 278e-6±256e-6   | -0.247±0.179          | -4.6                    | -4.85                 | 10.0±1.09    |
| Saro_0803                                                                                             | 35.7e-6±7.71e-6 | -0.235±1.9e-2         | -5.83                   | -6.07                 | 7.15±0.235   |
| notes: the binding determination of Saro_0803 and related mutants to the resveratrol                  |                 |                       |                         |                       |              |



## Reference

- 1 Hao, Z. *et al.* The multiple antibiotic resistance regulator MarR is a copper sensor in *Escherichia coli*. *Nat Chem Biol* 2014, **10**, 21-28. <https://doi.org/10.1038/nchembio.1380>
- 2 Lomovskaya, O.; Lewis, K.; Matin, A. EmrR is a negative regulator of the *Escherichia coli* multidrug resistance pump EmrAB. *J Bacteriol* 1995, **177**, 2328-2334. <https://doi.org/10.1128/jb.177.9.2328-2334.1995>
- 3 Will, W. R. *et al.* The Evolution of SlyA/RovA Transcription Factors from Repressors to Countersilencers in Enterobacteriaceae. *mBio* 2019, **10**. <https://doi.org/10.1128/mBio.00009-19>
- 4 Altschul, S. F. *et al.* Gapped BLAST and PSI-BLAST: a new generation of protein database search programs. *Nucleic Acids Res* 1997, **25**, 3389-3402. <https://doi.org/10.1093/nar/25.17.3389>
